# Supplementary material
Source: HighWire-hosted journal article supplement (https://bmjopen.bmj.com/content/12/6/e057941)
Supplement: inline-supplementary-material-2 [file inline-supplementary-material-2.pdf]

## Planned, ongoing and completed tuberculosis treatment trials in Brazil, Russia, India, China, and South Africa: A 2019 cross-sectional descriptive analysis

### APPENDIX 2

#### SECTION A: Basic analysis

**Table 1.** Two-way table showing primary outcome reporting on trials completed 12 or more months by date versus registration status, recruiting country type, funding sources, and trial location.

|                                | Primary outcome at completion | Primary outcome same for trial and published record | Primary outcome not the same for trial and published record | Total      | P value |
|--------------------------------|-------------------------------|-----------------------------------------------------|-------------------------------------------------------------|------------|---------|
|                                | n(%)                          | n(%)                                                | n(%)                                                        | No.        |         |
| <b>Registration status</b>     |                               |                                                     |                                                             |            |         |
| Not reported                   | 7 (94)                        | 0 (0)                                               | 1 (6)                                                       | 8          | 0.001   |
| Prospective                    | 41 (38)                       | 46 (43)                                             | 20 (19)                                                     | 107        |         |
| Retrospective                  | 7 (17)                        | 24 (59)                                             | 10 (24)                                                     | 41         |         |
| <b>Total</b>                   | <b>55 (35)</b>                | <b>70 (45)</b>                                      | <b>31 (20)</b>                                              | <b>156</b> |         |
| <b>Recruiting country type</b> |                               |                                                     |                                                             |            |         |
| Multi-national                 | 42 (50)                       | 35 (41)                                             | 8 (9)                                                       | 85         | 0.0017  |
| Single country                 | 13 (18)                       | 35 (49)                                             | 23 (32)                                                     | 71         |         |
| <b>Total</b>                   | <b>55 (35)</b>                | <b>70 (45)</b>                                      | <b>31 (20)</b>                                              | <b>156</b> |         |
| <b>Funding source grouped</b>  |                               |                                                     |                                                             |            |         |
| Local_Organisation             | 7 (17)                        | 19 (48)                                             | 14 (35)                                                     | 40         | -       |
| International_organisation     | 11 (28)                       | 21 (52)                                             | 7 (18)                                                      | 39         |         |
| Multifunding                   | 3 (50)                        | 3 (50)                                              | 0 (0)                                                       | 6          |         |
| Industry                       | 11 (39)                       | 12 (43)                                             | 5 (18)                                                      | 28         |         |
| University                     | 3 (20)                        | 7 (70)                                              | 1 (10)                                                      | 10         |         |
| Hospital                       | 6 (50)                        | 3 (25)                                              | 3 (25)                                                      | 12         |         |
| Self_funding                   | 7 (70)                        | 2 (20)                                              | 1 (10)                                                      | 10         |         |
| Not_reported                   | 7 (70)                        | 3 (30)                                              | 0 (0)                                                       | 10         |         |
| <b>Total</b>                   | <b>55 (35)</b>                | <b>70 (45)</b>                                      | <b>31 (20)</b>                                              | <b>156</b> |         |
| <b>Trial Location Country</b>  |                               |                                                     |                                                             |            |         |
| Brazil                         | 3 (60)                        | 1 (20)                                              | 1 (20)                                                      | 5          | -       |
| China                          | 7 (64)                        | 2 (13)                                              | 2 (13)                                                      | 11         |         |
| India                          | 2 (7)                         | 17 (63)                                             | 8 (30)                                                      | 27         |         |
| Multiple countries             | 22 (58)                       | 10 (26)                                             | 6 (16)                                                      | 38         |         |
| Russia                         | 7 (27)                        | 14 (54)                                             | 5 (19)                                                      | 26         |         |
| South Africa                   | 14 (29)                       | 26 (53)                                             | 9 (18)                                                      | 49         |         |
| <b>Total</b>                   | <b>55 (35)</b>                | <b>70 (45)</b>                                      | <b>31 (20)</b>                                              | <b>156</b> |         |

Fisher exact test is used to calculate the p value. There is significant difference between registration status and primary outcome. There is also significance difference observed between recruitment

## Planned, ongoing and completed tuberculosis treatment trials in Brazil, Russia, India, China, and South Africa: A 2019 cross-sectional descriptive analysis

country type and primary outcome. Funding source and trial location has small cell number, thus no p value provided.

**Table 2.** Two-way table comparing recruitment centres between recruitment country types

| Recruitment centres | Multiple countries |    | Single countries |     | Total |     | P value |
|---------------------|--------------------|----|------------------|-----|-------|-----|---------|
|                     | %                  | n  | %                | n   | %     | n   |         |
| Multi-centre        | 56                 | 77 | 44               | 59  | 100   | 136 | 0.00    |
| Single centre       | 0                  | 0  | 98.3             | 117 | 100   | 119 |         |
| <b>Total</b>        | 30.4               | 77 | 69.6             | 176 | 100   | 253 |         |

Fisher exact test is used to calculate the p value. There is significant difference when comparing recruitment centres between recruitment country types.

**Table 3.** Two-way table showing registration status versus trial location countries

| Registration status | Brazil |    | China |    | India |    | Multiple countries |    | Russia |    | South Africa |    | Total |     |
|---------------------|--------|----|-------|----|-------|----|--------------------|----|--------|----|--------------|----|-------|-----|
|                     | %      | n  | %     | n  | %     | n  | %                  | n  | %      | n  | %            | n  | %     | n   |
| Not reported        | 0      | 0  | 0     | 0  | 0     | 0  | 0                  | 0  | 91.3   | 21 | 0            | 0  | 8.3   | 21  |
| Prospective         | 36.4   | 4  | 69.1  | 38 | 50.9  | 27 | 85.7               | 66 | 4.3    | 1  | 79.4         | 27 | 64.4  | 163 |
| Retrospective       | 63.6   | 7  | 30.9  | 17 | 49.1  | 26 | 14.3               | 11 | 4.3    | 1  | 20.6         | 7  | 27.3  | 69  |
| <b>Total</b>        | 100    | 11 | 100   | 55 | 100   | 53 | 100                | 77 | 100    | 23 | 100          | 34 | 100   | 253 |

**Table 3:** Two-way table comparing registration status between recruiting country type

| Registration status | Multiple countries |    | Single countries |     | Total |     | P value |
|---------------------|--------------------|----|------------------|-----|-------|-----|---------|
|                     | %                  | n  | %                | n   | %     | n   |         |
| Not reported        | 0                  | 0  | 11.9             | 21  | 8.3   | 21  | 0.00    |
| Prospective         | 85.7               | 66 | 55.1             | 97  | 64.4  | 163 |         |
| Retrospective       | 14.3               | 11 | 33               | 58  | 27.3  | 69  |         |
| <b>Total</b>        | 100                | 77 | 100              | 176 | 100   | 253 |         |

Fisher exact test is used to calculate the p value. There is significant difference when comparing registration status between recruitment country type.

**Table 4:** Two-way table comparing recruitment status between recruitment country types

| Recruitment status | Multiple countries |     | Single countries |     | Total |     | P value |
|--------------------|--------------------|-----|------------------|-----|-------|-----|---------|
|                    | %                  | No. | %                | No. | %     | No. |         |
| Complete           | 1.3                | 1   | 0.6              | 1   | 0.8   | 2   | 0.039   |
| Not recruiting     | 70.1               | 54  | 64.2             | 113 | 66    | 167 |         |
| Not reported       | 2.6                | 2   | 11.9             | 21  | 9.1   | 23  |         |
| Recruiting         | 24.7               | 19  | 23.3             | 41  | 23.7  | 60  |         |
| Terminated         | 1.3                | 1   | 0                | 0   | 0.4   | 1   |         |
| <b>Total</b>       | 100                | 77  | 100              | 176 | 100   | 253 |         |

## Planned, ongoing and completed tuberculosis treatment trials in Brazil, Russia, India, China, and South Africa: A 2019 cross-sectional descriptive analysis

Fisher exact test is used to calculate the p value. There is significant difference when comparing recruitment status between recruitment country type.

**Table 6:** Two-way table comparing funding sources between recruitment country types

| Funding source grouped     | Multiple countries |           | Single countries |            | Total      |            | P value* |
|----------------------------|--------------------|-----------|------------------|------------|------------|------------|----------|
|                            | %                  | No.       | %                | No.        | %          | No.        |          |
| Local_Organisation         | 11.7               | 9         | 31.3             | 55         | 25.3       | 64         | 0.00     |
| International_organisation | 46.8               | 36        | 12.5             | 22         | 22.9       | 58         |          |
| multifunding               | 9.1                | 7         | 6.8              | 12         | 7.5        | 19         |          |
| Industry                   | 20.8               | 16        | 15.9             | 28         | 17.4       | 44         |          |
| University                 | 5.2                | 4         | 10.2             | 18         | 8.7        | 22         |          |
| Hospital                   | 1.3                | 1         | 7.4              | 13         | 5.5        | 14         |          |
| Self_funding               | 1.3                | 1         | 8                | 14         | 5.9        | 15         |          |
| Other                      | 3.9                | 3         | 8                | 14         | 6.7        | 17         |          |
| <b>Total</b>               | <b>100</b>         | <b>77</b> | <b>100</b>       | <b>176</b> | <b>100</b> | <b>253</b> |          |

\*chi 2 used to calculate the p value. There are significant differences when comparing funding sources between recruitment country types.

**Table 7:** Two-way table comparing primary outcomes of published trials between recruitment country types.

| Primary Outcome | Multiple countries |           | Single countries |           | Total      |            | P value |
|-----------------|--------------------|-----------|------------------|-----------|------------|------------|---------|
|                 | %                  | No.       | %                | No.       | %          | No.        |         |
| Yes             | 81.4               | 35        | 60.3             | 35        | 69.3       | 70         | 0.029   |
| No              | 18.6               | 8         | 39.7             | 23        | 30.7       | 31         |         |
| <b>Total</b>    | <b>100</b>         | <b>43</b> | <b>100</b>       | <b>58</b> | <b>100</b> | <b>101</b> |         |

Fisher exact test is used to calculate the p value. There is significant difference when comparing primary outcome of published studies only between recruitment country type.

## Planned, ongoing and completed tuberculosis treatment trials in Brazil, Russia, India, China, and South Africa: A 2019 cross-sectional descriptive analysis

### SECTION B: Survival analysis.

This graph shows the overall Kaplan-Meier survival estimate, with a median publication time of 25 months.

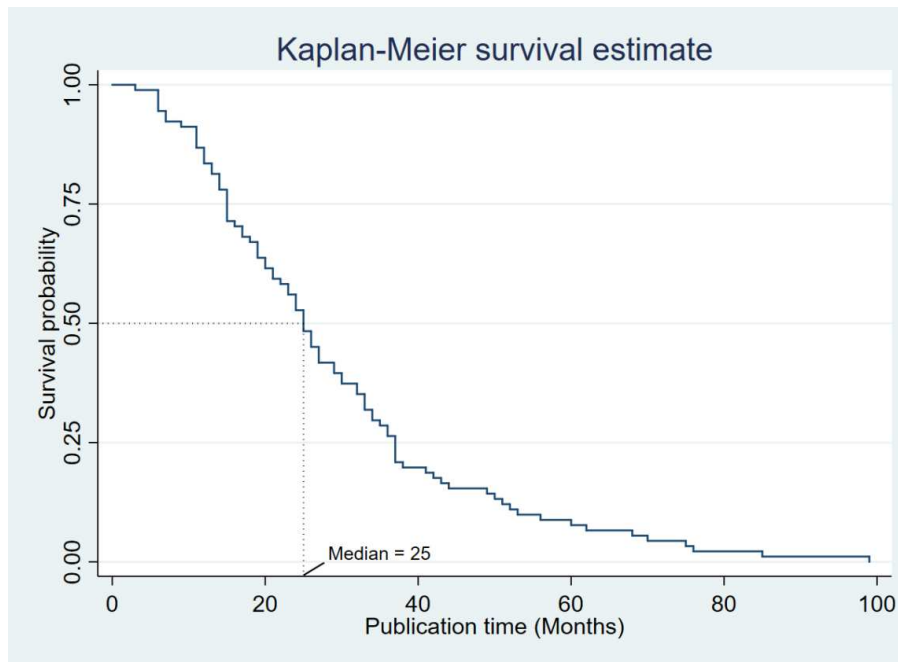

**Figure 1:** This graph shows the overall Kaplan-Meier survival estimate for single country with a median publication time of 26 months.

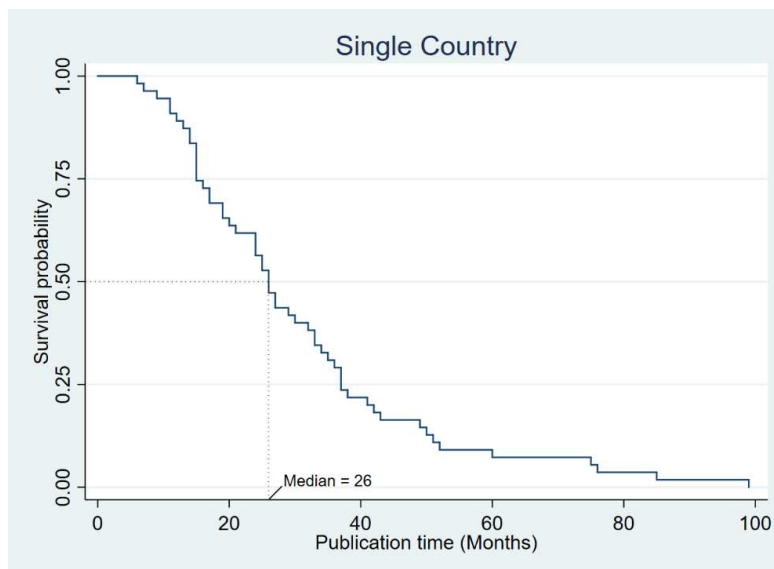

## Planned, ongoing and completed tuberculosis treatment trials in Brazil, Russia, India, China, and South Africa: A 2019 cross-sectional descriptive analysis

**Figure 2:** This graph shows the overall Kaplan-Meier survival estimate for multinational studies with a median publication time of 23 months. This shows that multinational studies takes shorter time to publish as compared with single country study.

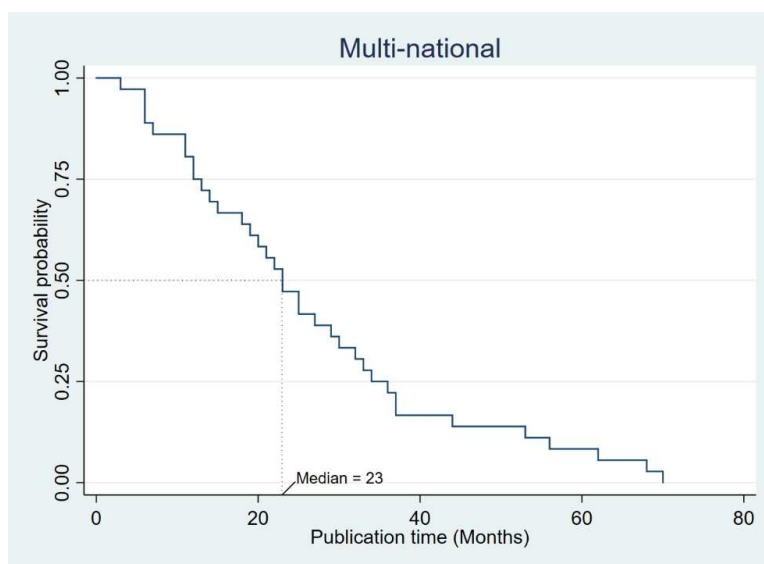

**Figure 3:** This graph shows the overall Kaplan-Meier survival estimate for India trial location with a median publication time of 29 months.

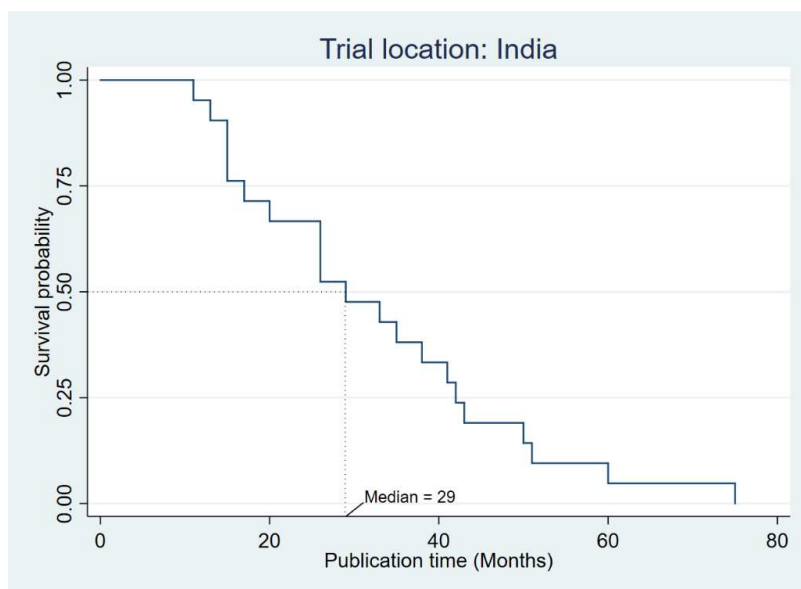

## Planned, ongoing and completed tuberculosis treatment trials in Brazil, Russia, India, China, and South Africa: A 2019 cross-sectional descriptive analysis

**Figure 4:** This graph shows the overall Kaplan-Meier survival estimate for China trial location with a median publication time of 25 months.

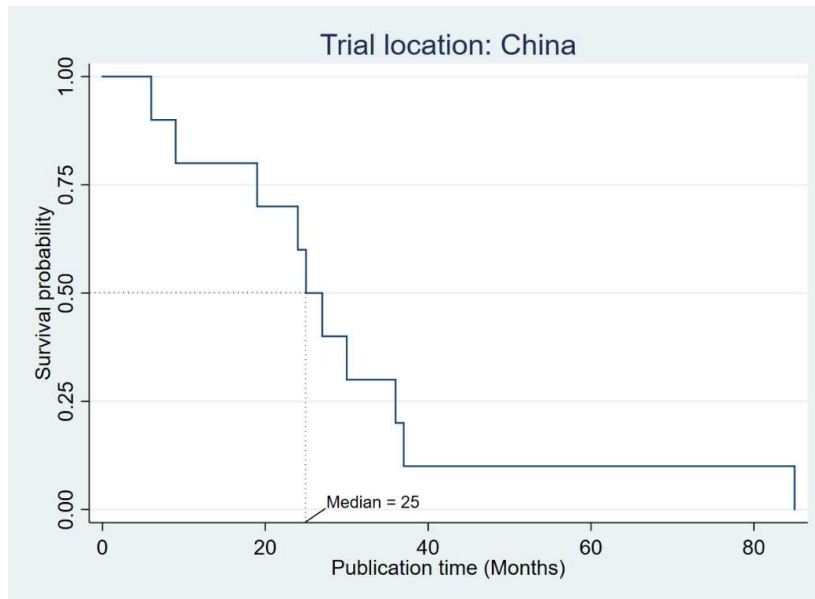

**Figure 5:** This graph shows the overall Kaplan-Meier survival estimate for Multi-countries trial location with a median publication time of 23 months.

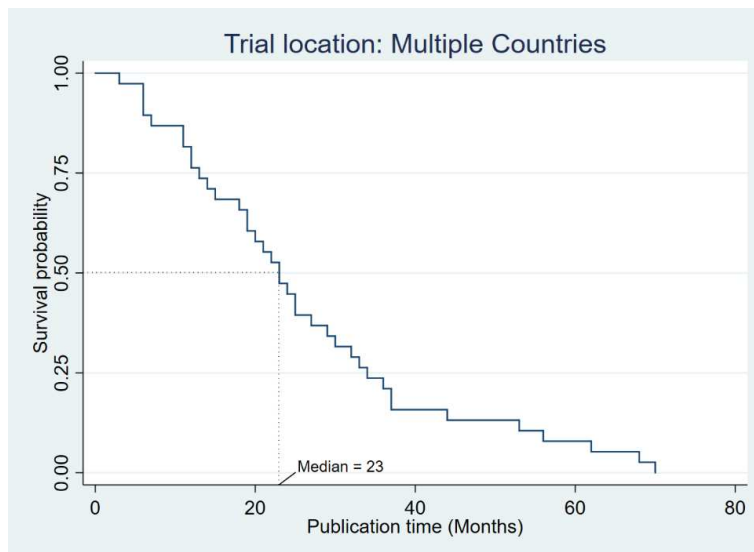

**Figure 6:** This graph shows the overall Kaplan-Meier survival estimate for combine Brazil, Russia and South Africa trial location with a median publication time of 24 months.

**Planned, ongoing and completed tuberculosis treatment trials in Brazil, Russia, India, China, and South Africa: A 2019 cross-sectional descriptive analysis**

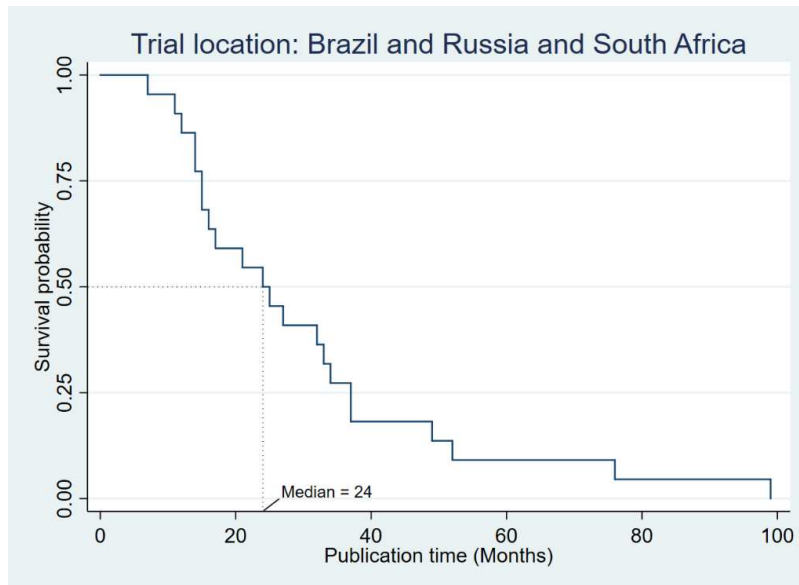

**Figure 7:** Multi-countries trial location studies takes shorter time to publish as compared to the other trial locations.

## Planned, ongoing and completed tuberculosis treatment trials in Brazil, Russia, India, China, and South Africa: A 2019 cross-sectional descriptive analysis

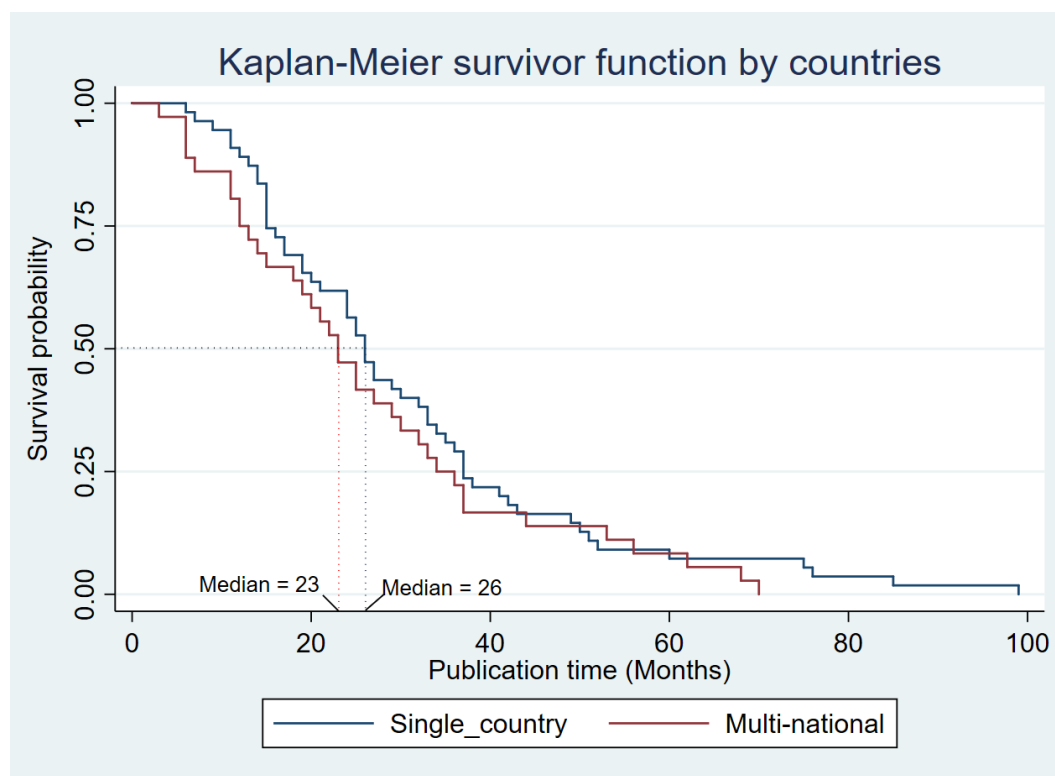

**Figure 8:** graph showing publication time for single country verse multi-national country.

**Table 8:** Test For Equality Between Groups

|                     | n (%)    | Logrank test | Wilcoxon test |
|---------------------|----------|--------------|---------------|
| Countries           |          |              |               |
| Single              | 171 (70) | 0.3117       | 0.2617        |
| Multi-national      | 73 (30)  |              |               |
| Trial country       |          |              |               |
| China               | 52 (21)  | 0.6789       | 0.5012        |
| India               | 51 (21)  |              |               |
| Multiple Countries  | 73 (30)  |              |               |
| Brazil, Russia & SA | 68 (28)  |              |               |
| Registrationstat    |          |              |               |
| Not reported        | 9 (21)   | 0.413        | 0.3558        |
| Prospective         | 64 (156) |              |               |
| Retrospective       | 27 (67)  |              |               |



## **Planned, ongoing and completed tuberculosis treatment trials in Brazil, Russia, India, China, and South Africa: A 2019 cross-sectional descriptive analysis**

The table 1, compares the curves between the group for each variable used for survival analysis. We used Log-rank test and Wilcoxon test to compares whether the publication time between the groups is different in average. We see that there is no significance difference between the groups. For example, there is no significance difference between publication time for single country verse multi-national country.
